# Supplementary material
Source: publisher site journal article supplement (https://www.dovepress.com/get_supplementary_file.php?f=393862.docx)
Supplement: Supplementary file 1 [file get_supplementary_file.php]

**Enzyme and** **Reactive Oxygen Species–Responsive Dual-Drug Delivery Nanocomplex for Tumor Chemo-Photodynamic Therapy**

Qian Xie1,#, Shi Gao1,#, Rui Tian2, Guohao Wang3, Zainen Qin4, Minglong Chen1, Wenhui Zhang1, Qiang Wen1 , Qingjie Ma1,*, Lei Zhu1,†, *

1. Department of Nuclear Medicine, China-Japan Union Hospital of Jilin University, NHC Key Laboratory of Radiobiology, School of Public Health of Jilin University, Changchun, 130033, China;
2. Department of Ophthalmology Second Hospital, Jilin University, Changchun, 130033, China;
3. Cancer Centre, Faculty of Health Sciences, University of Macau, Macau SAR, 999078, China; Institute of Translational Medicine, Faculty of Health Sciences, University of Macau, Macau SAR, 999078, China;
4. Department of Oral Radiology, Guangxi Medical University College of Stomatology, Nanning, 530021 China.

# These authors contributedequally to this manuscript.

† Current address: Department of Surgery, Emory University School of Medicine, Atlanta, GA 30322, USA.

* To whom correspondence should be addressed. E-mail: [maqj@jlu.edu.cn](mailto:maqj@jlu.edu.cn) (Q.M.) and [zeh.ray8@gmail.com](mailto:zeh.ray8@gmail.com) (L.Z.)

**Figure S1.** Production and characterization of tk-CA-amine. a). Synthesis of tk-CA-amine. b). LC-MS analysis of tk-CA-amine. c). HPLC analysis of the purity of tk-CA-amine.

**Figure S2.** Production of ROS and hyaluronidase responsive HA-tk-CA.

**Figure S3.** The CMC of HA-tk-CA nanoparticles.

**Figure S4.** Standard curves of HCPT and Ce6 determined by HPLC. a). The linear regression equation for HCPT is y = 0.097x + 0.0067, R2 = 0.995. b). The linear regression equation for Ce6 is y = 0.116x + 0.018, R2=0.989.

**Figure S5.** Stability of HTCC in different buffers. a) Stability of HTCC, Ce6, HCPT in water, PBS, 10% fetal bovine serum (FBS), and cell medium after a week. b) Size changes of HTCC in 7 days incubation in different buffers.

**Figure S6.** HCPT releasing profile from HTCC at different concentrations of hyaluronidase.

**Figure S7.** Ce6 releasing profile in HTCC under different conditions.

**Figure S8.** Live and dead cells staining after HANP treatment combined with laser irradiation.

**Figure S9.** Ki67 staining of proliferation cells in tumors received different treatments. a). Ki76 staining of tumors received different treatments. b). Quantification of dead cell numbers as stained in a). *, p<0.05.
